# Supplementary material for: Wildfire-Residential Risk Analysis Using Building Characteristics and Simulations to Enhance Structural Fire Resistance in Greece
Source: MDPI journal article supplement (doi:10.3390/fire6100403), 2023-10-19
Supplement: s1 [file s1]

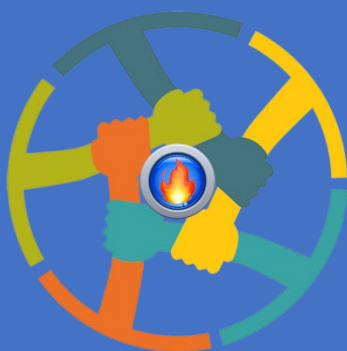

# WREIS

## WILDFIRE RISK EVALUATION INDEX FOR STRUCTURES

by Menemenlis D., Palaiologou P. and Kalabokidis K.

|                   |  |  |
|-------------------|--|--|
| STRUCTURE ADDRESS |  |  |
|                   |  |  |
|                   |  |  |
| COORDINATES:      |  |  |
| DATE:             |  |  |
| INSPECTOR NAME:   |  |  |
| WILDFIRE ANALYST: |  |  |

### STRUCTURE RISK ASSESSMENT CARD DUE TO WILDFIRE

This assessment card is based to Wildfire Risk Evaluation Index for Structures (WREIS) and is divided into 2 parts. Part 1 is completed by an expert in the analysis of wildfire characteristics, while Part 2 is completed by the structure managers themselves. Each sub-index of the card requires information about the structure, surrounding vegetation, as well as individual and community infrastructure and firefighting resources available at the specific location. At the end, a final score is calculated to reflect the vulnerability of the structure due a wildfire event.

#### PART 1

|  | SUB-INDEX 1. FUEL, TOPOGRAPHY and WEATHER |        |
|-------------------------------------------------------------------------------------|-------------------------------------------|--------|
|                                                                                     | RANKING CATEGORY                          | SCORE* |
| 1.                                                                                  | LOW LEVEL                                 | 5      |
| 2.                                                                                  | MEDIUM LEVEL                              | 10     |
| 3.                                                                                  | HIGH LEVEL                                | 15     |
| 4.                                                                                  | EXTREME LEVEL                             | 20     |
|                                                                                     | TOTAL SUB-INDEX SCORE                     |        |

\* Completed by an expert in the analysis of wildfire characteristics

## PART 2

For each Hazard Factor - select one point rating score and enter in score column on right.

| <b>SUB-INDEX 2. BUILDING ENVELOPE</b> |                                                    |                                                             |                                 |                                                         |                                     |                                                                   |   |
|---------------------------------------|----------------------------------------------------|-------------------------------------------------------------|---------------------------------|---------------------------------------------------------|-------------------------------------|-------------------------------------------------------------------|---|
| HAZARD FACTOR                         |                                                    | CHARACTERISITCS AND POINTING RATINGS                        |                                 |                                                         |                                     | SCORE                                                             |   |
| 1.                                    | Structure Material                                 | Concrete, bricks, cement blocks                             |                                 | Wood                                                    |                                     | Chipboard, plastic                                                |   |
|                                       |                                                    | 0                                                           |                                 | 5                                                       |                                     | 10                                                                |   |
| 2.                                    | Roof Material                                      | Concrete, asphalt shingles, cement blocks                   |                                 | Clay Tiles Sheets                                       |                                     | Wood, Chipboard, plastic                                          | + |
|                                       |                                                    | 0                                                           |                                 | 5                                                       |                                     | 10                                                                |   |
| 3.                                    | Shutters                                           | Aluminum, metallic                                          | Wooden, new                     | Plastic or older wooden                                 | There are no covers on the openings |                                                                   | + |
|                                       |                                                    | 0                                                           | 5                               | 5                                                       | 10                                  |                                                                   |   |
| 4.                                    | Gutter type and cleanliness                        | Metal gutter – no leaf debris                               | Plastic gutter – no leaf debris | Metal gutter with leaf debris                           | Plastic gutter with leaf debris     | +                                                                 |   |
|                                       |                                                    | 0                                                           | 5                               | 5                                                       | 10                                  |                                                                   |   |
| 5.                                    | Unprotected openings (chimneys, ventilation, etc.) | Openings are protected by dense metal mesh                  |                                 | Some openings, unprotected                              |                                     | Many unprotected openings                                         | + |
|                                       |                                                    | 0                                                           |                                 | 5                                                       |                                     | 10                                                                |   |
| 6.                                    | Window glass                                       | Strengthened (tempered)                                     |                                 | Double glazed                                           |                                     | Single paned                                                      | + |
|                                       |                                                    | 0                                                           |                                 | 5                                                       |                                     | 10                                                                |   |
| 7.                                    | Position on Slope                                  | Structure is located on the bottom or lower portion of hill |                                 | The structure abuts the hill and has more than 2 floors |                                     | Structure is located on the mid to upper portion or crest of hill | + |
|                                       |                                                    | 0                                                           |                                 | 5                                                       |                                     | 10                                                                |   |
| <b>TOTAL SUB-INDEX SCORE</b>          |                                                    |                                                             |                                 |                                                         |                                     |                                                                   |   |

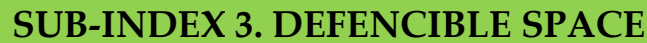

| HAZARD FACTOR              |                                                                                                       | CHARACTERISTICS AND POINTING RATINGS                                             |                                              |                                                                                                    |                             | SCORE |
|----------------------------|-------------------------------------------------------------------------------------------------------|----------------------------------------------------------------------------------|----------------------------------------------|----------------------------------------------------------------------------------------------------|-----------------------------|-------|
| Defense Zone 1 (0-2 m)     |                                                                                                       |                                                                                  |                                              |                                                                                                    |                             |       |
| 1.                         | 2 m from the ground level exterior footprint of the structure including any attachments or extensions | Surface with non-combustible debris or materials, fences or plants present       |                                              | Surface with combustible debris or materials, fences or plants present                             |                             |       |
|                            |                                                                                                       | 0                                                                                |                                              | 10                                                                                                 |                             |       |
| Defense Zone 2 (2 – 5 m)   |                                                                                                       |                                                                                  |                                              |                                                                                                    |                             |       |
| 2.                         | Forest vegetation                                                                                     | Deciduous trees                                                                  | Mix of tree types (deciduous and coniferous) | Coniferous                                                                                         |                             | +     |
|                            |                                                                                                       |                                                                                  |                                              | >3 m distance between trees                                                                        | <3 m distance between trees |       |
|                            |                                                                                                       | 0                                                                                | 5                                            | 5                                                                                                  | 10                          |       |
| 3.                         | Surface vegetation and combustible materials                                                          | Grass <10 cm height or non-combustible surface, non-combustible materials stored |                                              | Grass >10 cm height or highly flammable plants, combustible materials stored. (Firewood, branches) |                             | +     |
|                            |                                                                                                       | 0                                                                                |                                              | 10                                                                                                 |                             |       |
| Defense Zone 3 (5 – 10 m)  |                                                                                                       |                                                                                  |                                              |                                                                                                    |                             |       |
| 4.                         | Forest vegetation                                                                                     | Deciduous trees                                                                  | Mix of tree types (deciduous and coniferous) | Coniferous                                                                                         |                             | +     |
|                            |                                                                                                       |                                                                                  |                                              | >3 m distance between trees                                                                        | <3 m distance between trees |       |
|                            |                                                                                                       | 0                                                                                | 5                                            | 5                                                                                                  | 10                          |       |
| 5.                         | Flammable shrubs                                                                                      | None                                                                             |                                              | Scattered                                                                                          | Abundant                    | +     |
|                            |                                                                                                       | 0                                                                                |                                              | 5                                                                                                  | 10                          |       |
| 6.                         | Surface vegetation and combustible materials                                                          | Grass <10 cm height or non-combustible surface, non-combustible materials stored |                                              | Grass >10 cm height or highly flammable plants, combustible materials stored. (Firewood, branches) |                             | +     |
|                            |                                                                                                       | 0                                                                                |                                              | 10                                                                                                 |                             |       |
| 7.                         | Low-lying coniferous branches (< 3 m from the ground)                                                 | None                                                                             |                                              | Present                                                                                            |                             | +     |
|                            |                                                                                                       | 0                                                                                |                                              | 10                                                                                                 |                             |       |
| Defense Zone 4 (10 – 30 m) |                                                                                                       |                                                                                  |                                              |                                                                                                    |                             |       |
| 8.                         | Forest vegetation                                                                                     | Deciduous trees                                                                  | Mix of tree types (deciduous and coniferous) | Coniferous                                                                                         |                             | +     |
|                            |                                                                                                       |                                                                                  |                                              | >3 m distance between trees                                                                        | <3 m distance between trees |       |
|                            |                                                                                                       | 0                                                                                | 5                                            | 5                                                                                                  | 10                          |       |
| 9.                         | Flammable shrubs                                                                                      | None                                                                             |                                              | Scattered                                                                                          | Abundant                    | +     |
|                            |                                                                                                       | 0                                                                                |                                              | 5                                                                                                  | 10                          |       |
| 10.                        | Surface vegetation and combustible materials                                                          | Grass <10 cm height or non-combustible surface, non-combustible materials stored |                                              | Grass >10 cm height or high flammability plants, combustible materials stored (Firewood, branches) |                             | +     |
|                            |                                                                                                       | 0                                                                                |                                              | 10                                                                                                 |                             |       |
| 11.                        | Low-lying coniferous branches (<3 m from the ground)                                                  | None                                                                             |                                              | Present                                                                                            |                             | +     |
|                            |                                                                                                       | 0                                                                                |                                              | 10                                                                                                 |                             |       |
| TOTAL SUB-INDEX SCORE      |                                                                                                       |                                                                                  |                                              |                                                                                                    |                             |       |

|  |                                           | SUB-INDEX 4. FIRE SUPPRESSION SYSTEM |                                                                     |                                                                  |       |
|-----------------------------------------------------------------------------------|-------------------------------------------|--------------------------------------|---------------------------------------------------------------------|------------------------------------------------------------------|-------|
| SAFETY FACTOR                                                                     |                                           | CHARACTERISITCS AND POINTING RATINGS |                                                                     |                                                                  | SCORE |
| 1.                                                                                | Water supply                              | None                                 | Permanent water supply system connected to the settlement's network | Independent water tank with its own pump and backup power source |       |
|                                                                                   |                                           | 10                                   | 5                                                                   | 0                                                                |       |
| 2.                                                                                | Self-contained water suppression system   | None                                 | Water pumps                                                         | Fire suppression foam                                            | +     |
|                                                                                   |                                           | 10                                   | 5                                                                   | 0                                                                |       |
| 3.                                                                                | Self-contained wildfire sprinkler systems | None                                 | Indoor fire sprinklers                                              | Exterior fire sprinklers                                         | +     |
|                                                                                   |                                           | 10                                   | 5                                                                   | 0                                                                |       |
| TOTAL SUB-INDEX SCORE                                                             |                                           |                                      |                                                                     |                                                                  |       |

|  | SUB-INDEX 5. COMMUNITY INFRASTRUCTURE                                 |                                                                              |                                             |                                                                              |                                                                                       |       |
|-------------------------------------------------------------------------------------|-----------------------------------------------------------------------|------------------------------------------------------------------------------|---------------------------------------------|------------------------------------------------------------------------------|---------------------------------------------------------------------------------------|-------|
| SAFETY FACTOR                                                                       |                                                                       | CHARACTERISITCS AND POINTING RATINGS                                         |                                             |                                                                              |                                                                                       | SCORE |
| 1.                                                                                  | Access to the community                                               | Road width where, after parking of vehicles, will leave a free width of <3 m |                                             | Road width where, after parking of vehicles, will leave a free width of >3 m |                                                                                       |       |
|                                                                                     |                                                                       | 5                                                                            |                                             | 0                                                                            |                                                                                       |       |
| 2.                                                                                  | Fuel breaks around the Community                                      | No fuel breaks                                                               | <100 m width                                |                                                                              | >100 m width                                                                          | +     |
|                                                                                     |                                                                       | 10                                                                           | 5                                           |                                                                              | 0                                                                                     |       |
| 3.                                                                                  | Community firefighting network                                        | No fire hydrants in the specific area (radius of 200 m)                      | Fire hydrants connected to the city network |                                                                              | Fire hydrants connected to an independent water tank with its own pump and spare pump | +     |
|                                                                                     |                                                                       | 10                                                                           | 5                                           |                                                                              | 0                                                                                     |       |
| 4.                                                                                  | Fire extinguishing water cannons and/or systems for humidity increase | None                                                                         | Water cannons                               | Sprinklers for humidity increase                                             | Water cannons and sprinklers                                                          | +     |
|                                                                                     |                                                                       | 10                                                                           | 5                                           | 5                                                                            | 0                                                                                     |       |
| TOTAL SUB-INDEX SCORE                                                               |                                                                       |                                                                              |                                             |                                                                              |                                                                                       |       |

| <b>WREIS TOTAL SCORE</b>                         |  |
|--------------------------------------------------|--|
| <b>SUB-INDEX 1. FUEL, TOPOGRAPHY and WEATHER</b> |  |
| <b>SUB-INDEX 2. BUILDING ENVELOPE</b>            |  |
| <b>SUB-INDEX 3. DEFENCIBLE SPACE</b>             |  |
| <b>SUB-INDEX 4. FIRE SUPPRESSION SYSTEM</b>      |  |
| <b>SUB-INDEX 5. COMMUNITY INFRASTRUCTURE</b>     |  |

**TOTAL SCORE**

| <b>TOTAL SCORE<br/>(points)</b> | <b>HAZARD<br/>CLASSIFICATION</b>        |
|---------------------------------|-----------------------------------------|
| <b>Up to 21</b>                 | <b>Lowest Damage Likelihood (LDL)</b>   |
| <b>21-30</b>                    | <b>Moderate Damage Likelihood (MDL)</b> |
| <b>31-35</b>                    | <b>High Damage Likelihood (HDL)</b>     |
| <b>Above 35</b>                 | <b>Extreme Damage Likelihood (HDL)</b>  |

**PLEASE READ** – Legal Disclaimer – The information contained herein provides general information only. While it is believed to be accurate, it is provided without representation or warranty of any kind, including as to its accuracy or its suitability for the purpose(s) for which you may wish to rely on it. Accordingly, any and all use of or reliance on such information shall be in your own discretion and at your own risk. For greater clarity, authors of this document accept no responsibility or liability for any injury, loss or damage, whether direct, indirect, special, incidental, punitive or consequential, that any person may sustain as a result of the information in, the results of, or anything done or omitted pursuant to, this assessment.
